# Supplementary material
Source: publisher figshare collection journal article supplement (https://acs.figshare.com/ndownloader/files/24116303)
Supplement: Supplementary file 1 [file 24116303]

## Extracellular Ca<sup>2+</sup>-sensing fluorescent protein biosensor based on a collagen-binding domain

Irina A. Okkelman<sup>1</sup>, Ryan McGarrigle<sup>2</sup>, Shane O'Carroll<sup>1</sup>, Daniel Carvajal Berrio<sup>3,4</sup>, Katja Schenke-Layland<sup>3,4,5,6</sup>, James Hynes<sup>2</sup>, Ruslan I. Dmitriev<sup>1,7,8\*</sup>

\*to whom the correspondence should be addressed:

<sup>1</sup>Metabolic Imaging Group, Laboratory of Biophysics and Bioanalysis, ABCRF, University College Cork, Cavanagh Pharmacy Building, College Road T12K8AF, Cork, Ireland; Phone: 021-4901699; E-mail: [r.dmitriev@ucc.ie](mailto:r.dmitriev@ucc.ie);

<sup>8</sup>Tissue engineering and Biomaterials Group, Department of Human Structure and Repair, Faculty of Medicine and Health Sciences, Ghent University, C. Heymanslaan 10, 9000 Ghent, Belgium. E-mail: [Ruslan.Dmitriev@UGent.be](mailto:Ruslan.Dmitriev@UGent.be);

### Supplementary figures S1-S7

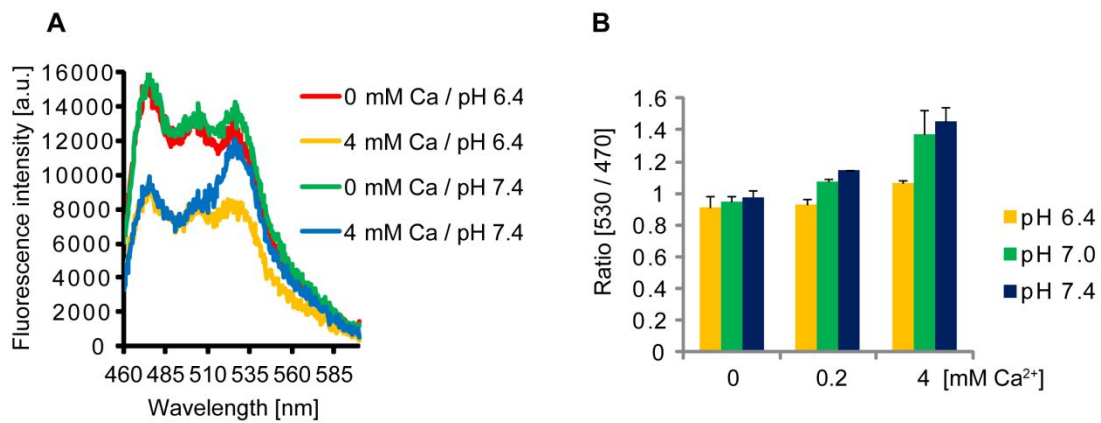

**Figure S1. pH sensitivity of ColBD-Twitch protein.** The protein was diluted to 0.07  $\mu$ M in buffers with different pH and concentrations of CaCl<sub>2</sub> as indicated and measured on a microplate reader at 470 nm and 530 nm emission wavelengths, and in spectral emission scan modes. A: pH-dependence of emission spectra at 0 and 4 mM CaCl<sub>2</sub>. B: pH-dependent ratio responses. N=3.

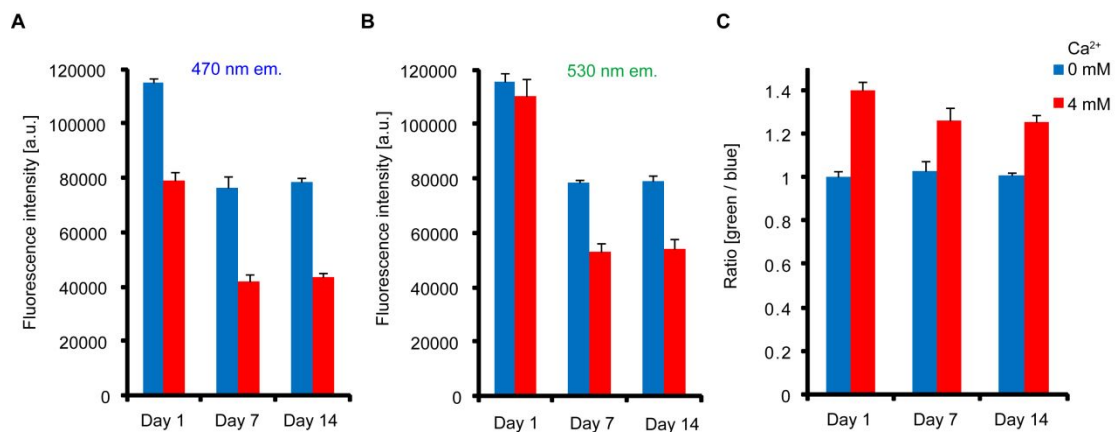

## Supporting information

**Figure S2. Storage stability of ColBD-Twitch protein.** Sample was diluted to 0.1  $\mu\text{M}$ , measured on a microplate reader immediately or after storing at 4  $^{\circ}\text{C}$  for 7 and 14 days. A, B: Fluorescence intensity at different wavelengths. C: Ratio (530/ 470 nm). N=3.

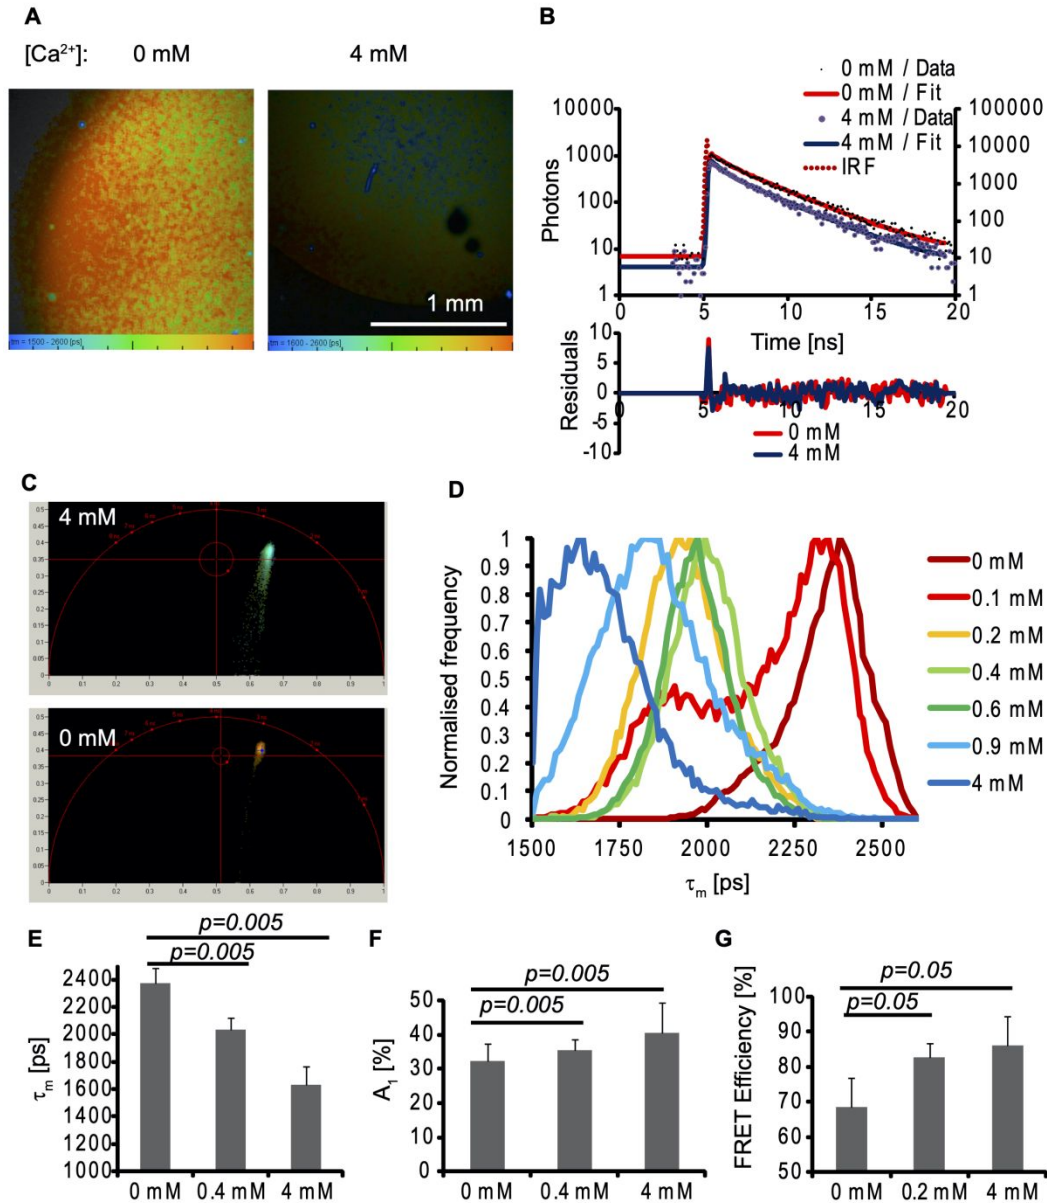

**Figure S3. Biosensing properties of ColBD-Twitch protein measured on a confocal FLIM microscope.** ColBD-Twitch-stained (1  $\mu\text{M}$ , 3 h) Matrigel matrix was used for measurements at various concentrations of CaCl<sub>2</sub> (37  $^{\circ}\text{C}$ ). A: Examples of FLIM images for donor channel (405 nm exc., 468 nm em., double-exponential fit,  $\tau_m$ ) of stained Matrigel. B: Example of double-exponential decay fitting. C: Examples of Phasor diagrams. D: Normalized fluorescence lifetime frequency distribution histograms for FLIM images produced at 0-4 mM CaCl<sub>2</sub>. E, F, G: comparisons of  $\tau_m$  (double-exponential fit),  $A_1$  fraction (%) and FRET efficiency [%] in response to Ca<sup>2+</sup> binding.

## Supporting information

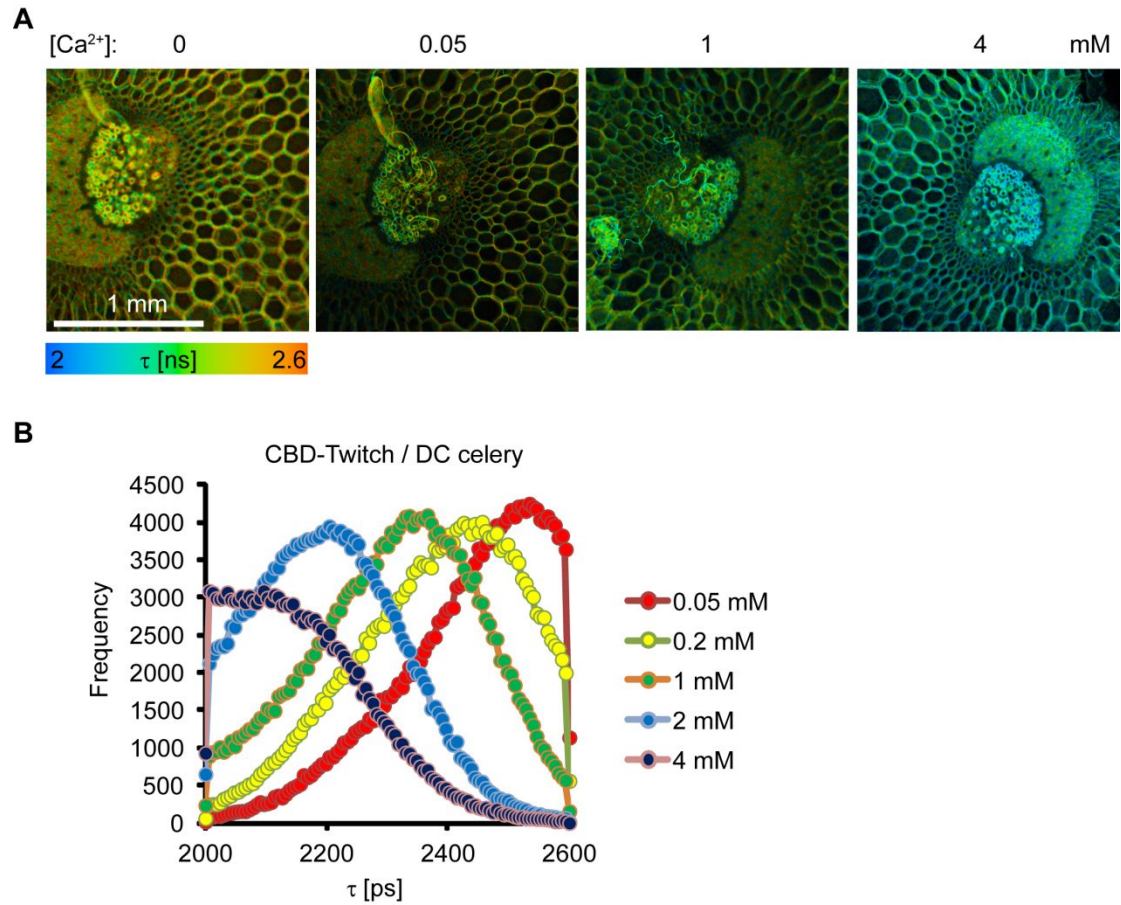

**Figure S4. Ca<sup>2+</sup>-dependent FLIM response** of decellularized celery matrix stained with CBD-Twitch protein (1  $\mu$ M in HBSS, overnight incubation) and measured in the presence of different concentrations of CaCl<sub>2</sub>. Examples of FLIM images (A) and normalized lifetime frequency distribution histograms (B).

## Supporting information

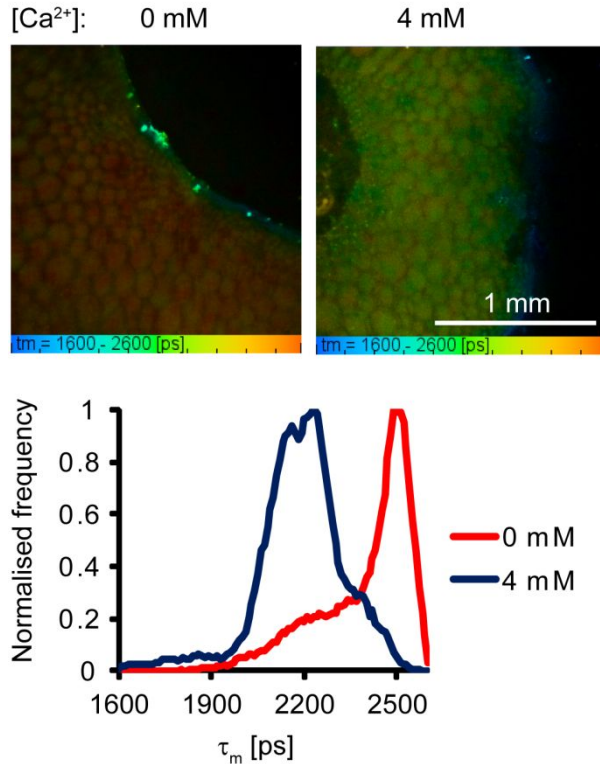

**Figure S5.  $\text{Ca}^{2+}$ -dependent FLIM response** with decellularized celery matrix pre-coated with Collagen IV (0.1%, overnight incubation) and stained with ColBD-Twitch protein (1  $\mu\text{M}$ , overnight). Produced matrix was subsequently imaged on FLIM (405 nm exc., 468 nm em.) at 0 and 4 mM  $\text{CaCl}_2$  in PBS. Below: normalized fluorescence lifetime distribution histograms.

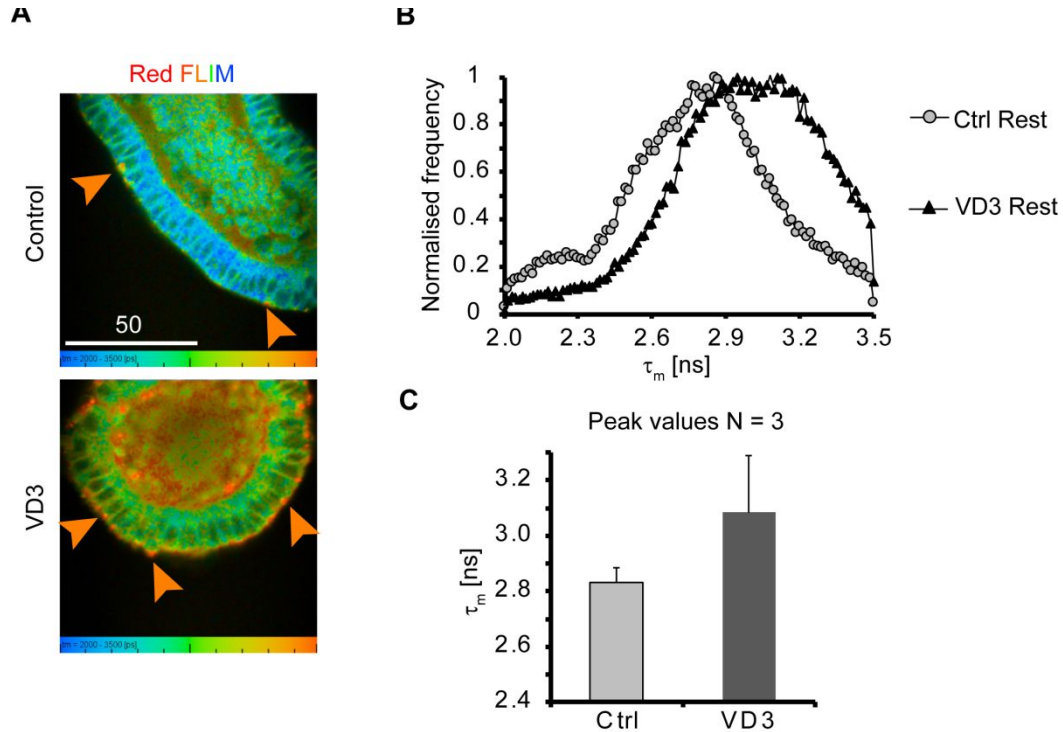

**Figure S6: Live confocal FLIM of Nile Red-stained intestinal organoids shows  $\text{Ca}^{2+}$  and VD3-dependent responses.** Organoids grown in presence of VD3 (100 nM, 3 d) were treated with 2.5 mM EGTA. A: FLIM images in red fluorescence (565-605 nm emission of Nile Red) channel. B, C: Lifetime distribution histograms and comparison of peak values for different experimental conditions. Scale bar is in  $\mu\text{m}$ .

## Supporting information

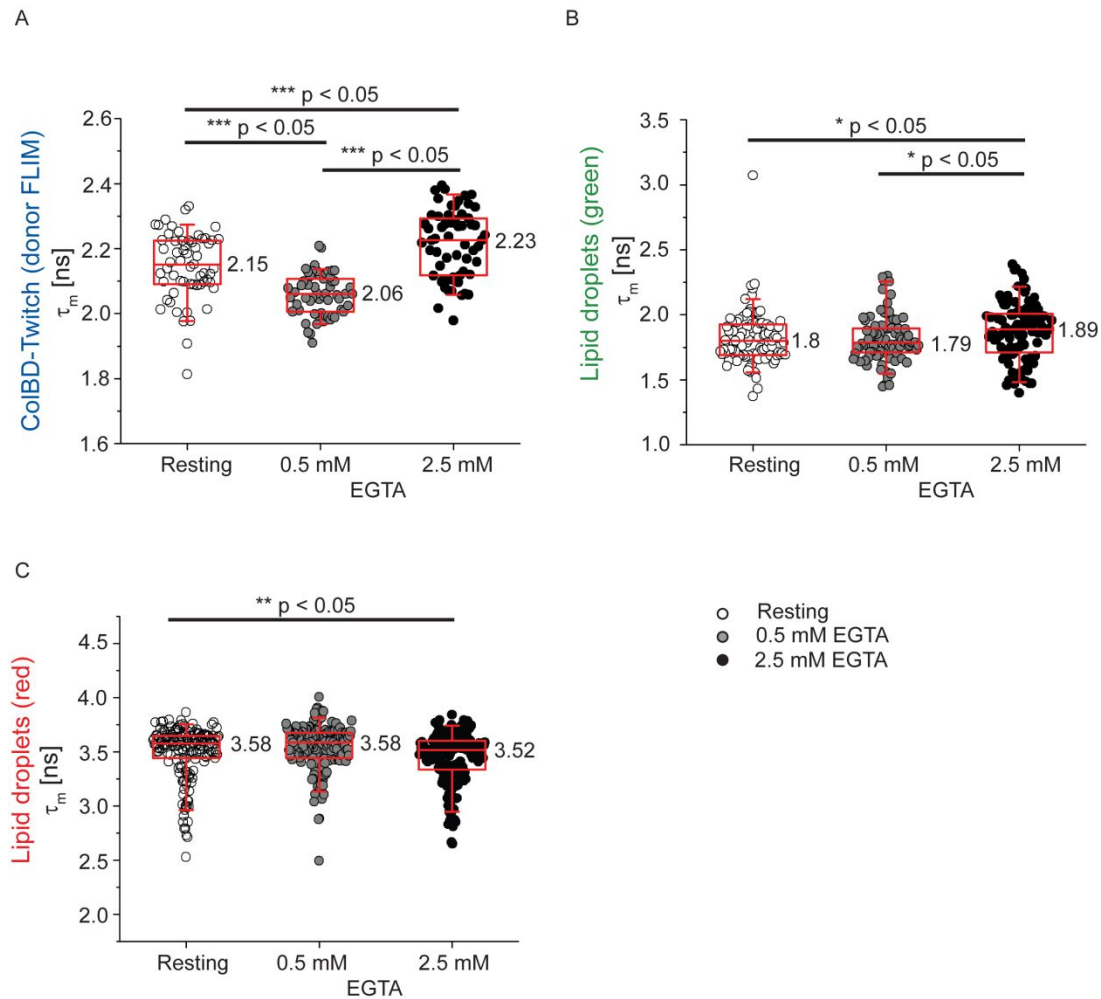

**Figure S7. ‘General statistical analysis’** of fluorescence lifetimes for donor FLIM channel (Matrix) measured with ColBD-Twitch (a), green (b) and red (c) spectral fractions of Nile Red measured and calculated at rest and different concentrations of EGTA added to the culture of live intestinal organoids (**second experiment**). Data distributions correspond to the average lifetime values calculated from ROIs taken from 6 organoid images per each condition. P values indicate statistical significance (Mann-Whitney test): \* -  $p < 0.05$ , \*\* -  $p < 0.005$  and \*\*\* -  $p < 0.0005$ . Box charts correspond to median (values shown in numbers), 25 and 75 percentiles. Whiskers show 5 and 95 percentiles.
